# Supplementary material for: Estimation of anthropogenic and volcanic SO 2 emissions from satellite data in the presence of snow/ice on the ground
Source: Copernicus journal article supplement (doi:10.5194/egusphere-2023-1240), 2023-08-17
Supplement: Supplementary file [file egusphere-2023-1240-AC2-supplement.pdf]

The manuscript " Estimation of anthropogenic and volcanic SO<sub>2</sub> emissions from satellite data in the presence of snow/ice on the ground" from Fioletov et al. focusses on improving existing SO<sub>2</sub> emission inventories based on satellite data by explicitly including measurements over snow, which are usually excluded in these inventories. These inventories therefore likely underestimate emissions of sources at high latitudes, which are covered by snow for part of a year.

The authors have generated new site-specific AMFs for snow conditions and evaluated the impact on the SO<sub>2</sub> inventory, showing a significant improvement.

I recommend publication after some minor corrections:

We would like to thank the reviewer for his favorable comment.

Line 64: "...for assessment the efficiency..." - it should be "...for assessment OF the efficiency..."

Corrected

Line 66: "... volcanic SO<sub>2</sub> is is used ..." - it should be "... volcanic SO<sub>2</sub> is used..."

Corrected

Section 2.3, Line 172ff: I suggest to move your discussion about the SO<sub>2</sub> lifetime from Sect. 3.3 line 404ff here, since it gives a very good explanation why you use the same decay time for snow and snow-free conditions and it fits better in this section...

We moved the section and deleted one sentence to make it shorter.

Line 193: What is the reason for using CRF<0.3 for cloud&snow-free conditions? 0.3 is really high and you will certainly use pixels which are partly covered by clouds, especially for the big pixel size of OMI... What happens if you use e.g. CRF<0.1?

We tested other limits (CRF<0.1 and CRF<0.2) for the catalogue paper and found that the emission estimates are very similar, although their uncertainties are somewhat larger than those for CRF<0.3. The limit CRF<0.3 gives slightly more pixels that is important to OMI. Note that the first and last 10 cross-track positions (the largest OMI pixels) were excluded from our analysis.

Line 202ff: I a msising information here which Snow/Ice information for TROPOMI data you use. You describe it for OMI, but not for TROPOMI

The snow cover information was obtained from the Interactive Multisensor Snow and Ice Mapping System measurements (IMS) (Helfrich et al., 2007). It was used for both OMI and TROPOMI. We added this to the text in section 2.4.

[Line 202ff: TROPOMI data also contains VIIRS cloud data, that you could use and that provides more accurate results on CF...](#)

Thank you for this information. We will test VIIRS data from TROPOMI files in the future. The present study is focused on OMI data and TROPOMI data are used mostly for illustrative purposes.
